# Supplementary material
Source: publisher figshare collection journal article supplement (https://sage.figshare.com/ndownloader/files/17461730)
Supplement: Supplementary file 1 [file 17461730]

Reviewer 3 v.2

Comments to the author:

The authors appear to have addressed the main issues in this manuscript and the large cohort is worthy of publication. The main limitation of only a few patients at 3 years still persists.
